# Supplementary material for: Real-Time Quaking-Induced Conversion Analysis for the Diagnosis of Sporadic Creutzfeldt-Jakob Disease in Korea
Source: PubMed Central journal article supplement — J Clin Neurol. 2015 Nov 4;12(1):101–6. doi: 10.3988/jcn.2016.12.1.101 (PMC4712274; doi:10.3988/jcn.2016.12.1.101), 2015-11-04
Supplement: jcn-12-101-s001.pdf [file jcn-12-101-s001.pdf]

**Supplementary Table 1.** Full list of CSF analysis and RT-QuIC positivity of 81 CSF of sCJD patients in Korea

| No. | Age (yr)/Sex | 14-3-3 protein | Total tau (pg/mL) | RT-QuIC* |
|-----|--------------|----------------|-------------------|----------|
| 1   | 70/M         | Positive       | 117               | N (0/4)  |
| 2   | 75/M         | Positive       | 30                | N (0/4)  |
| 3   | 27/F         | Positive       | 475               | N (0/4)  |
| 4   | 79/F         | Positive       | 1,092             | P (3/4)  |
| 5   | 48/F         | Positive       | 3,158             | P (3/4)  |
| 6   | 66/M         | Positive       | 1,203             | N (0/4)  |
| 7   | 82/M         | Positive       | 5,248             | P (4/4)  |
| 8   | 71/M         | Positive       | 2,290             | P (1/4)  |
| 9   | 50/M         | Positive       | 3,182             | N (0/4)  |
| 10  | 50/M         | Positive       | 3,954             | P (4/4)  |
| 11  | 66/F         | Positive       | 4,260             | P (3/4)  |
| 12  | 64/M         | Positive       | 14,813            | P (1/4)  |
| 13  | 63/F         | Positive       | 11,386            | P (1/4)  |
| 14  | 68/F         | Positive       | 18,900            | P (4/4)  |
| 15  | 73/M         | Positive       | 7,362             | P (4/4)  |
| 16  | 67/M         | Positive       | 19,604            | N (0/4)  |
| 17  | 54/F         | Positive       | 6,098             | P (4/4)  |
| 18  | 56/M         | Positive       | 4,186             | P (4/4)  |
| 19  | 42/F         | Positive       | 7,641             | N (0/4)  |
| 20  | 72/F         | Positive       | 600               | N (0/4)  |
| 21  | 47/M         | Positive       | 2,987             | P (4/4)  |
| 22  | 61/F         | Positive       | 4,892             | P (4/4)  |
| 23  | 76/M         | Positive       | 8,341             | P (4/4)  |
| 24  | 66/M         | Positive       | 2,907             | P (3/4)  |
| 25  | 51/M         | Positive       | 2,257             | P (2/4)  |
| 26  | 63/F         | Positive       | 1,517             | P (3/4)  |
| 27  | 43/F         | Positive       | 1,514             | N (0/4)  |
| 28  | 74/M         | Positive       | 21,996            | N (0/4)  |
| 29  | 72/M         | Positive       | 930               | P (4/4)  |
| 30  | 75/M         | Positive       | 1,016             | P (3/4)  |
| 31  | 80/F         | Positive       | 3,525             | P (4/4)  |
| 32  | 79/M         | Positive       | 5,961             | P (3/4)  |
| 33  | 70/F         | Positive       | 3,049             | P (4/4)  |
| 34  | 62/M         | Positive       | 3,774             | N (0/4)  |
| 35  | 39/F         | Positive       | 1,839             | P (4/4)  |
| 36  | 73/M         | Positive       | 15,825            | P (2/4)  |
| 37  | 73/M         | Positive       | 3,959             | P (3/4)  |
| 38  | 56/M         | Positive       | 2,289             | P (4/4)  |
| 39  | 58/M         | Positive       | 8,127             | P (4/4)  |
| 40  | 76/M         | Positive       | 4,801             | P (2/4)  |
| 41  | 69/M         | Positive       | 20,529            | P (4/4)  |
| 42  | 60/M         | Positive       | 9,994             | P (2/4)  |
| 43  | 76/M         | Positive       | 9,763             | P (3/4)  |
| 44  | 57/F         | Positive       | 14,264            | P (4/4)  |
| 45  | 65/M         | Positive       | 19,234            | P (4/4)  |
| 46  | 70/M         | Positive       | 14,213            | P (4/4)  |
| 47  | 54/F         | Positive       | 34,772            | P (3/4)  |
| 48  | 77/M         | Positive       | 1,469             | N (0/4)  |

**Supplementary Table 1.** Full list of CSF analysis and RT-QuIC positivity of 81 CSF of sCJD patients in Korea (continued)

| No.                                                               | Age (yr)/Sex | 14-3-3 protein | Total tau (pg/mL) | RT-QuIC*      |
|-------------------------------------------------------------------|--------------|----------------|-------------------|---------------|
| 49                                                                | 56/F         | Positive       | 16,816            | P (2/4)       |
| 50                                                                | 75/F         | Positive       | 5,158             | P (3/4)       |
| 51                                                                | 66/M         | Positive       | 16,734            | P (4/4)       |
| 52                                                                | 74/F         | Positive       | 3,196             | P (4/4)       |
| 53                                                                | 71/F         | Positive       | 3,928             | P (4/4)       |
| 54                                                                | 75/F         | Positive       | 18,912            | P (3/4)       |
| 55                                                                | 69/M         | Positive       | 4,174             | P (4/4)       |
| 56                                                                | 78/F         | Positive       | 14,862            | N (0/4)       |
| 57                                                                | 47/F         | Positive       | 5,840             | N (0/4)       |
| 58                                                                | 69/M         | Positive       | 21,170            | P (4/4)       |
| 59                                                                | 69/M         | Positive       | 11,721            | N (0/4)       |
| 60                                                                | 71/M         | Positive       | 709               | N (0/4)       |
| 61                                                                | 75/F         | Positive       | 115               | P (1/4)       |
| 62                                                                | 82/F         | Positive       | 3,710             | N (0/4)       |
| 63                                                                | 71/F         | Positive       | 1,234             | N (0/4)       |
| 64                                                                | 78/M         | Positive       | 2,107             | P (3/4)       |
| 65                                                                | 63/M         | Positive       | 3,402             | P (3/4)       |
| 66                                                                | 67/F         | Positive       | 7,048             | P (4/4)       |
| 67                                                                | 64/M         | Positive       | 3,491             | P (3/4)       |
| 68                                                                | 68/F         | Positive       | 9,033             | P (4/4)       |
| 69                                                                | 57/M         | Positive       | 14,643            | P (4/4)       |
| 70                                                                | 68/F         | Positive       | 2,923             | P (2/4)       |
| 71                                                                | 70/F         | Positive       | 10,265            | P (4/4)       |
| 72                                                                | 58/M         | Positive       | 23,071            | P (4/4)       |
| 73                                                                | 67/F         | Positive       | 2,141             | N (0/4)       |
| 74                                                                | 54/F         | Positive       | 20,830            | P (1/4)       |
| 75                                                                | 54/F         | Positive       | 3,025             | P (4/4)       |
| 76                                                                | 65/M         | Positive       | 445               | P (1/4)       |
| 77                                                                | 81/M         | Positive       | 8,651             | P (4/4)       |
| 78                                                                | 86/M         | Positive       | 17,473            | P (4/4)       |
| 79                                                                | 59/F         | Positive       | 9,935             | P (4/4)       |
| 80                                                                | 53/F         | Positive       | 7,413             | P (3/4)       |
| 81                                                                | 65/F         | Positive       | 895               | P (1/4)       |
| Number of samples with positive reactions/total number of samples |              |                |                   | 62/81 (76.5%) |

\*After checking 14-3-3 protein's level, RT-QuIC reaction was performed using the CSF specimens of definite or probable sCJD patients in the Republic of Korea (37 females and 44 males; aged 27–86). CSF with at least one positive reaction of quadruplicate was defined as positive in the RT-QuIC reaction. The levels of total tau in CSF have been used as a biomarker for the diagnosis of CJD (total tau >1,400 pg/mL).<sup>14</sup> 1–12: patients in 2010, 13–24: patients in 2011, 25–44: patients in 2012, 45–65: patients in 2013, 66–81: patients in 2014.

CJD: Creutzfeldt-Jakob disease, CSF: cerebrospinal fluid, N: negative reaction, P: positive reaction, RT-QuIC: real-time quaking-induced conversion, sCJD: sporadic CJD.
