# Supplementary material for: Real-Time Quaking-Induced Conversion Analysis for the Diagnosis of Sporadic Creutzfeldt-Jakob Disease in Korea
Source: PubMed Central journal article supplement — J Clin Neurol. 2015 Nov 4;12(1):101–6. doi: 10.3988/jcn.2016.12.1.101 (PMC4712274; doi:10.3988/jcn.2016.12.1.101), 2015-11-04
Supplement: jcn-12-101-s002.pdf [file jcn-12-101-s002.pdf]

**Supplementary Table 2.** Full list of CSF analysis and RT-QuIC positivity of 100 CSF of non-CJD patients in Korea

| No. | Age (yr)/Sex | 14-3-3 protein | Total tau (pg/mL) | RT-QuIC* |
|-----|--------------|----------------|-------------------|----------|
| 1   | 69/M         | Negative       | 143               | N (0/4)  |
| 2   | 66/F         | Negative       | 54                | N (0/4)  |
| 3   | 50/M         | Negative       | 96                | N (0/4)  |
| 4   | 77/F         | Negative       | 250               | N (0/4)  |
| 5   | 62/M         | Negative       | 206               | N (0/4)  |
| 6   | 79/F         | Negative       | 122               | N (0/4)  |
| 7   | 82/F         | Negative       | 170               | N (0/4)  |
| 8   | 59/M         | Negative       | 63                | N (0/4)  |
| 9   | 78/F         | Negative       | 99                | N (0/4)  |
| 10  | 70/M         | Negative       | 103               | N (0/4)  |
| 11  | 79/F         | Negative       | 216               | N (0/4)  |
| 12  | 47/M         | Negative       | 157               | N (0/4)  |
| 13  | 72/M         | Negative       | 237               | N (0/4)  |
| 14  | 64/M         | Negative       | 70                | N (0/4)  |
| 15  | 70/F         | Negative       | 55                | N (0/4)  |
| 16  | 64/M         | Negative       | 210               | N (0/4)  |
| 17  | 71/M         | Negative       | 229               | N (0/4)  |
| 18  | 83/F         | Negative       | 556               | N (0/4)  |
| 19  | 45/F         | Negative       | 387               | N (0/4)  |
| 20  | 60/M         | Negative       | 268               | N (0/4)  |
| 21  | 65/F         | Negative       | 993               | N (0/4)  |
| 22  | 61/F         | Negative       | 230               | N (0/4)  |
| 23  | 61/M         | Negative       | 234               | N (0/4)  |
| 24  | 83/F         | Negative       | 124               | N (0/4)  |
| 25  | 55/M         | Negative       | 603               | N (0/4)  |
| 26  | 64/M         | Negative       | 600               | N (0/4)  |
| 27  | 76/F         | Negative       | 520               | N (0/4)  |
| 28  | 74/F         | Negative       | 70                | N (0/4)  |
| 29  | 68/M         | Negative       | 141               | N (0/4)  |
| 30  | 47/M         | Negative       | 76                | N (0/4)  |
| 31  | 79/F         | Negative       | 84                | N (0/4)  |
| 32  | 58/M         | Negative       | 42                | N (0/4)  |
| 33  | 49/F         | Negative       | 412               | N (0/4)  |
| 34  | 60/M         | Negative       | 165               | N (0/4)  |
| 35  | 55/M         | Negative       | 303               | N (0/4)  |
| 36  | 53/M         | Negative       | 391               | N (0/4)  |
| 37  | 61/M         | Negative       | 277               | N (0/4)  |
| 38  | 50/M         | Negative       | 188               | N (0/4)  |
| 39  | 80/M         | Negative       | 318               | N (0/4)  |
| 40  | 58/F         | Negative       | 270               | N (0/4)  |
| 41  | 58/M         | Negative       | 323               | N (0/4)  |
| 42  | 78/F         | Negative       | 125               | N (0/4)  |
| 43  | 79/M         | Negative       | 257               | N (0/4)  |
| 44  | 76/F         | Negative       | 358               | N (0/4)  |
| 45  | 63/M         | Negative       | 558               | N (0/4)  |
| 46  | 53/F         | Negative       | 882               | N (0/4)  |
| 47  | 84/M         | Negative       | 226               | N (0/4)  |
| 48  | 81/M         | Negative       | 265               | N (0/4)  |
| 49  | 65/M         | Negative       | 330               | N (0/4)  |
| 50  | 51/F         | Negative       | 578               | N (0/4)  |
| 51  | 56/M         | Negative       | 1,087             | N (0/4)  |
| 52  | 58/M         | Negative       | 809               | N (0/4)  |

**Supplementary Table 2.** Full list of CSF analysis and RT-QuIC positivity of 100 CSF of non-CJD patients in Korea (continued)

| No.                                                               | Age (yr)/Sex | 14-3-3 protein | Total tau (pg/mL) | RT-QuIC*   |
|-------------------------------------------------------------------|--------------|----------------|-------------------|------------|
| 53                                                                | 75/F         | Negative       | 298               | N (0/4)    |
| 54                                                                | 72/M         | Negative       | 602               | N (0/4)    |
| 55                                                                | 84/M         | Negative       | 180               | N (0/4)    |
| 56                                                                | 70/F         | Negative       | 554               | N (0/4)    |
| 57                                                                | 77/M         | Negative       | 305               | N (0/4)    |
| 58                                                                | 33/M         | Negative       | 374               | N (0/4)    |
| 59                                                                | 71/M         | Negative       | 91                | N (0/4)    |
| 60                                                                | 71/M         | Negative       | 931               | N (0/4)    |
| 61                                                                | 77/F         | Negative       | 809               | N (0/4)    |
| 62                                                                | 65/F         | Negative       | 299               | N (0/4)    |
| 63                                                                | 46/M         | Negative       | 585               | N (0/4)    |
| 64                                                                | 53/F         | Negative       | 159               | N (0/4)    |
| 65                                                                | 56/M         | Negative       | 203               | N (0/4)    |
| 66                                                                | 75/M         | Negative       | 1,163             | N (0/4)    |
| 67                                                                | 73/M         | Negative       | 544               | N (0/4)    |
| 68                                                                | 75/M         | Negative       | 288               | N (0/4)    |
| 69                                                                | 69/F         | Negative       | 418               | N (0/4)    |
| 70                                                                | 77/M         | Negative       | 643               | N (0/4)    |
| 71                                                                | 71/M         | Negative       | 33                | N (0/4)    |
| 72                                                                | 78/F         | Negative       | 362               | N (0/4)    |
| 73                                                                | 64/M         | Negative       | 578               | N (0/4)    |
| 74                                                                | 62/M         | Negative       | 578               | N (0/4)    |
| 75                                                                | 54/M         | Negative       | 319               | N (0/4)    |
| 76                                                                | 77/M         | Negative       | 720               | N (0/4)    |
| 77                                                                | 72/F         | Negative       | 465               | N (0/4)    |
| 78                                                                | 64/M         | Negative       | 94                | N (0/4)    |
| 79                                                                | 67/F         | Negative       | 111               | N (0/4)    |
| 80                                                                | 64/F         | Negative       | 349               | N (0/4)    |
| 81                                                                | 54/F         | Negative       | 1,182             | N (0/4)    |
| 82                                                                | 70/M         | Negative       | 801               | N (0/4)    |
| 83                                                                | 69/M         | Negative       | 351               | N (0/4)    |
| 84                                                                | 56/M         | Negative       | 579               | N (0/4)    |
| 85                                                                | 82/F         | Negative       | 495               | N (0/4)    |
| 86                                                                | 78/M         | Negative       | 83                | N (0/4)    |
| 87                                                                | 79/M         | Negative       | 932               | N (0/4)    |
| 88                                                                | 53/F         | Negative       | 365               | N (0/4)    |
| 89                                                                | 91/M         | Negative       | 1,107             | N (0/4)    |
| 90                                                                | 53/F         | Negative       | 552               | N (0/4)    |
| 91                                                                | 72/M         | Negative       | 430               | N (0/4)    |
| 92                                                                | 46/M         | Negative       | 610               | N (0/4)    |
| 93                                                                | 58/M         | Negative       | 406               | N (0/4)    |
| 94                                                                | 79/M         | Negative       | 336               | N (0/4)    |
| 95                                                                | 73/F         | Negative       | 241               | N (0/4)    |
| 96                                                                | 67/F         | Negative       | 445               | N (0/4)    |
| 97                                                                | 66/M         | Negative       | 959               | N (0/4)    |
| 98                                                                | 62/F         | Negative       | 332               | N (0/4)    |
| 99                                                                | 62/M         | Negative       | 904               | N (0/4)    |
| 100                                                               | 65/F         | Negative       | 225               | N (0/4)    |
| Number of samples with positive reactions/total number of samples |              |                |                   | 0/100 (0%) |

\*After checking 14-3-3 protein's level, RT-QuIC reaction was performed using the CSF specimens of non-CJD patients in the Republic of Korea (39 females and 61 males; aged 33-91). The levels of total tau in CSF have been used as a biomarker for the diagnosis of CJD (total tau >1,400 pg/mL).<sup>14</sup> 1-24: patients in 2012, 25-67: patients in 2013, 68-00: patients in 2014.

CJD: Creutzfeldt-Jakob disease, CSF: cerebrospinal fluid, N: negative reaction, RT-QuIC: real-time quaking-induced conversion, sCJD: sporadic CJD.
